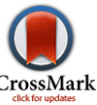

## Correction

# Correction: Partner Experiences of “Near-Miss” Events in Pregnancy and Childbirth in the UK: A Qualitative Study

## The PLOS ONE Staff

The affiliation for the second author is incomplete. Louise Locock should have the following added to her affiliation: Health Experiences Fellow, NIHR Oxford Biomedical Research Centre.

## Reference

1. Hinton L, Locock L, Knight M (2014) Partner Experiences of “Near-Miss” Events in Pregnancy and Childbirth in the UK: A Qualitative Study. PLoS ONE 9(4): e91735. doi:10.1371/journal.pone.0091735.

---

**Citation:** The PLOS ONE Staff (2014) Correction: Partner Experiences of “Near-Miss” Events in Pregnancy and Childbirth in the UK: A Qualitative Study. PLoS ONE 9(9): e108803. doi:10.1371/journal.pone.0108803

**Published:** September 17, 2014

**Copyright:** © 2014 The PLOS ONE Staff. This is an open-access article distributed under the terms of the Creative Commons Attribution License, which permits unrestricted use, distribution, and reproduction in any medium, provided the original author and source are credited.
